# Supplementary material for: The “sociotype” construct: Gauging the structure and dynamics of human sociality
Source: PubMed Central journal article supplement (PMC5730176; doi:10.1371/journal.pone.0189568), 2017-12-14
Supplement: pone.0189568.s006.pdf [file pone.0189568.s006.pdf]

## Short General Health Questionnaire (GHQ 12)

### Have you recently?

|                                                          |                    |                     |                        |                       |
|----------------------------------------------------------|--------------------|---------------------|------------------------|-----------------------|
| 1. Been able to concentrate on what you're doing?        | Better than usual  | Same as usual       | Less than usual        | Much less than usual  |
| 2. Lost much sleep over worry?                           | Not at all         | No more than usual  | Rather more than usual | Much more than usual  |
| 3. Felt you were playing a useful part in things?        | More so than usual | Same as usual       | Less useful than usual | Much less useful      |
| 4. Felt capable of making decisions about things?        | More so than usual | Same as usual       | Less so than usual     | Much less capable     |
| 5. Felt constantly under strain?                         | Not at all         | No more than usual  | Rather more than usual | Much more than usual  |
| 6. Felt you couldn't overcome your difficulties?         | Not at all         | No more than usual  | Rather more than usual | Much more than usual  |
| 7. Been able to enjoy your normal day-to-day activities? | More so than usual | Same as usual       | Less so than usual     | Much less than usual  |
| 8. Been able to face up to your problems?                | More so than usual | Same as usual       | Less so than usual     | Much less able        |
| 9. Been feeling unhappy and depressed?                   | Not at all         | No more than usual  | Rather more than usual | Much more than usual  |
| 10. Been losing confidence in yourself?                  | Not at all         | No more than usual  | Rather more than usual | Much more than usual  |
| 11. Been thinking of yourself as a worthless person?     | Not at all         | No more than usual  | Rather more than usual | Much more than usual  |
| 12. Been feeling reasonably happy, all things considered | More so than usual | About same as usual | Less so than usual     | Much less than usual; |
