# Supplementary material for: The “sociotype” construct: Gauging the structure and dynamics of human sociality
Source: PubMed Central journal article supplement (PMC5730176; doi:10.1371/journal.pone.0189568), 2017-12-14
Supplement: pone.0189568.s007.pdf [file pone.0189568.s007.pdf]

## Revised UCLA Loneliness Scale

Indicate how often you feel the way described in each statement using the following scale:

- 4 = "I feel this way **often**."  
3 = "I feel this way **sometimes**."  
2 = "I feel this way **rarely**."  
1 = "I have **never** felt this way."

|                                                              |  |
|--------------------------------------------------------------|--|
| 1. I feel in tune with the people around me                  |  |
| 2. I lack companionship                                      |  |
| 3. There is no-one I can turn to.                            |  |
| 4. I do not feel alone.                                      |  |
| 5. I feel part of a group of friends.                        |  |
| 6. I have a lot in common with the people around me.         |  |
| 7. I am no longer close to anyone.                           |  |
| 8. My interests and ideas are not shared by those around me. |  |
| 9. I am an outgoing person.                                  |  |
| 10. There are people I feel close to.                        |  |
| 11. I feel left out.                                         |  |
| 12. My social relationships are superficial.                 |  |
| 13. No-one really knows me well.                             |  |
| 14. I feel isolated from others.                             |  |
| 15. I can find companionship when I want it.                 |  |
| 16. There are people who really understand me.               |  |
| 17. I am unhappy being so withdrawn.                         |  |
| 18. People are around me but not with me.                    |  |
| 19. There are people I can talk to.                          |  |
| 20. There are people I can turn to.                          |  |
